# Supplementary material for: Nickelacycles with anionic C–N–N′ terdentate ligands containing (5,5), (5,6), (5,7) and (6,5) membered fused rings. Reaction with ethylene†
Source: Royal Society of Chemistry journal article supplement (doi:10.1039/b008520k), 2001-01-01
Supplement: b008520k-1s.doc [file b008520k-1s.doc]

**Figure 1S.** Ortep view of the structure of complex **2c** [Ni()](BF4) showing the atom labeling scheme. Hydrogen atoms have been omitted for clarity.
