# Supplementary material for: Nickelacycles with anionic C–N–N′ terdentate ligands containing (5,5), (5,6), (5,7) and (6,5) membered fused rings. Reaction with ethylene†
Source: Royal Society of Chemistry journal article supplement (doi:10.1039/b008520k), 2001-01-01
Supplement: b008520k.doc [file b008520k.doc]

**Synthesis of the ligands.-**

These were prepared by standard procedures, by heating together the stoichiometric amounts of the halogenoaryl carbonyl compound and the primary diamines in the appropriate solvent.

**a** (N,N'-bis(2-bromobenzylidene)-1.2-ethane-diamine)**.** The synthesis of this compound is reported in the literature25 and was modified as follows: 2.5 mmol of 1,2-diaminoethane were added over 5 mmol of 2-bromobenzaldehyde and 5 ml of ethanol. The reaction mixture was refluxed for 30 minutes. The solvent was then evaporated, and the crude product obtained as a white solid. The ligand can be recrystallized in hot ethanol, if necessary (Yield=85%). (Found: C, 48.4; H, 3.7; N, 7.3. Calc. for C16H14Br2N2: C, 48.76; H, 3.58; N, 7.11%). I.R.(C=N) = 1632 cm-1. 1H NMR(CDCl3): 4,04(s, 4H, CH2), 7.2-7.4(m, 4H), 7.54(dd, 3J=9, 4J=1.6, 2H, H6, H6'), 7.99(dd, 3J=9, 4J=1.6, 2H, H3, H3'), 8.66(s, Him).

**b** (N,N'-bis(2-chlorobenzylidene)-1.2-ethanediamine)26. Prepared using the same procedure used for **a**, with 1,2-diaminoethane and 2-chlorobenzaldehyde (Yield = 85%). (Found: C, 63.0; H, 4.7; N, 9.5. Calc. for C16H14Cl2N2: C, 62.97; H, 4.62; N, 9.18%). I.R. (C=N) = 1635 cm-1. 1H NMR(CDCl3): 4,04(s, 4H, CH2), 7.25-7.35(m, 6H), 8.01(d, 3J=7.3, 2H, H3, H3'), 8.73(s, Him).

**c** (N,N'-bis(2,6-dichlorobenzylidene)-ethane-1.2-diamine). Prepared using the same procedure as in **a** with 1,2-diaminoethane and 2,6-dichlorobenzaldehyde (Yield = 75%). (Found: C, 50.9; H, 3.2; N, 8.0. Calc. for C16H12Cl4N2: C, 51.37; H, 3.23; N, 7.49%). I.R. (C=N) = 1646 cm-1. 1H NMR(CDCl3): 4,14(s, 4H, CH2), 7.15-7.35(m, 6H), 8.52(s, Him).

**d** (N,N'-bis(2,6-dichlorobenzylidene)-propane-1,3-diamine). Prepared using the same procedure as in **a** with 1,3-diaminopropane and 2,6-dichlorobenzaldehyde (Yield = 99%). (Found: C, 51.8; H, 3.6; N, 7.1. Calc. for C17H14Cl4N2: C, 52.61; H, 3.64; N, 7.22%). I.R. (C=N) = 1646 cm-1. 1H NMR(CDCl3): 2.60(q, 3J = 8.3, 2H, CH2'), 3.88(td, 3J = 8.3, 4J = 1.8, 4H, CH2, CH2''), 7.15-7.40(m, 6H), 8.50(s, Him).

**e** (N,N'-bis(2,6-dichlorobenzylidene)-butane-1,4-diamine). Prepared using the same procedure used for **a** with 1,4-diaminobuthane and 2,6-dichlorobenzaldehyde (Yield = 80%). (Found: C, 53.2; H, 3.9; N, 6.7. Calc. for C18H16Cl4N2: C, 53.76; H, 4.01; N, 6.97%)**.** I.R. (C=N) = 1642 cm-1. 1H NMR(CDCl3): 1.91(m, 4H, CH2', CH2''), 3.78(m, 4H, CH2, CH2'''), 7.15-7.40(m, 6H), 8.45(s, Him).

**f** (N,N'-bis[2-(2-chlorophenyl)-1-phenylethylidene]-ethane-1,2-diamine).

a) *Preparation of the 2-chlorobenzylphenylketone.* Following the method described in the literature23, 2-chlorobenzylchloride (20 mmol) was added dropwise over 40 mmol of magnesium turnings in 50 ml of diethyl ether at R.T. Formation of the Grignard reagent was confirmed by G.C. The mixture was then cooled at 0ºC, and 18 mmol of benzonitrile in 30 ml of THF were slowly added. After the addition, the reaction was heated to reflux for 30 minutes. After cooling, the excess of reactant was hydrolyzed with 3N HCl and the product extracted with diethyl ether. Evaporation of the solvent and recristallization in hot ethanol/water lead to the ketone (Yield = 77%). (Found: C, 72.1; H, 5.0. Calc. for C14H11ClO: C, 72.89; H, 4.81%). 1H NMR(CDCl3): 4,45(s, 2H, CH2), 7.20-7.70(m, 7H), 8.05(dd, 3J = 9.6, 4J = 1.3, 2H, Ho(Ph)).

b) *Preparation of the ligand* **f**.- 8 mmol of the ketone, 4 mmol of 1,2-diaminoethane and a catalytic amount of H2SO4 were refluxed in toluene, using a Dean-Stark apparatus for 3 days, the progress of the reaction was monitored by 1H NMR. When the reaction was completedthe mixture was cooled, and the solvent evaporated in vacuum. Ethanol was added, and after standing for several days in the refrigerator white-yellow crystals were obtained (Yield = 66%). (Found: C, 72.2; H, 5.3; N, 5.7. Calc. for C30H26Cl2N2: C, 74.23; H, 5.40; N, 5.77%).I.R.(C=N) = 1630 cm-1.1H NMR(CDCl3, 250 MHz): 3.95(s, 4H), 4.23(s, 4H), 7.00-7.80(m, 18H).
